# Supplementary material for: Construction of DNA template sequences to generate fluorescent gold nanoclusters for the sensitive detection of DNA methyltransferase activity bioassay
Source: Royal Society of Chemistry journal article supplement (doi:10.1039/d4sd00215f), 2024-11-12
Supplement: d4sd00215f1.pdf [file d4sd00215f1.pdf]

# Supporting Information

## **Construction of DNA template sequences to generate fluorescent gold nanoclusters for the sensitive detection of DNA methyltransferase activity bioassay**

**Fangyu zhou<sup>a</sup>, Hui Chen<sup>a</sup>, Tingting Fan<sup>a</sup>, Zixia Guo<sup>a</sup>, Xiangyan Dong<sup>a</sup>, Feng Liu**

**a,b\***

a State Key Laboratory of Chemical Oncogenomics, Tsinghua Shenzhen International Graduate School, Shenzhen, 518055, PR China

b National & Local United Engineering Lab for Personalized Anti-tumor Drugs, Shenzhen Kivita Innovative Drug Discovery Institute, Tsinghua Shenzhen International Graduate School, Shenzhen, 518055, PR China

\*Corresponding author:

Email: [liu.feng@sz.tsinghua.edu.cn](mailto:liu.feng@sz.tsinghua.edu.cn)

## Table S1: The oligonucleotides used in this work

| DNA probe                  | Sequences (5'→3')                                                                               |
|----------------------------|-------------------------------------------------------------------------------------------------|
| DNA probe for M.SssI MTase | PO <sub>4</sub> - <u>G</u> TAGCTTAGTACATTGCTA <u>C</u> GTATCTTAGTACATTGATA <u>C</u>             |
| DNA probe for Dnmt1        | PO <sub>4</sub> - <u>G</u> TAGCTTAGTACATTGCTA <u>C</u> /m/ <u>G</u> TATCTTAGTACATTGATA <u>C</u> |
| T4 PNK                     | PO <sub>4</sub> -TTAGTACATTGCTGA <i>-PO<sub>4</sub></i>                                         |
| EcoR I                     | PO <sub>4</sub> - <i>TTCCGGCTGGATGATGTGCCGGAATTCCGGCTGGATGATGTGCCGGA</i>                        |

*The underline in the dumbbell ring DNA probe sequence marks the recognition and action site of M.SssI MTase in the sequence, the italic marks the recognition site of GluI. The italic marks the recognition site of T4 PNK in the T4 PNK probe sequence. The italic marks the recognition site of EcoR I in the EcoR I probe sequence.*

## Optimization of the conditions of the experiment

The efficiency of the assay system is influenced by a number of factors. A series of optimisations have been made to the parameters of the proposed biosensing strategy in order to achieve the best possible results. Firstly, the duration of action of the methyltransferase and endonuclease enzymes has been optimised. Secondly, the amount of endonuclease used was optimised. The amount of endonuclease used directly affects the amount of hairpin DNA released and therefore the fluorescence signal at the output. The optimal methylation and endonuclease action time was 2h

and the optimal amount of endonuclease was 2.5 U, as can be seen from the optimised fluorescence signal plots (Fig. S1. A, B).

It was then considered that the end-addition of tails has a direct effect on the subsequent signal output. Therefore, the time of action of the TdT used in this system was optimised, as the time of action of the TdT affects the length of the DNA stencil strand and plays an important role in the formation of the subsequent gold nanoclusters. The results (Fig. S1. C) show that the optimal TdT action time for the proposed bioassay is 1.5 h. Finally, the amount of TdT used was optimised. The TdT is an efficient enzyme that mediates a rapid tailing reaction in a short time. It is therefore hoped that the optimum amount of TdT can be found through optimisation experiments. The optimal amount of TdT for the proposed bioassay is 20 U as can be seen in Fig. S1. D.

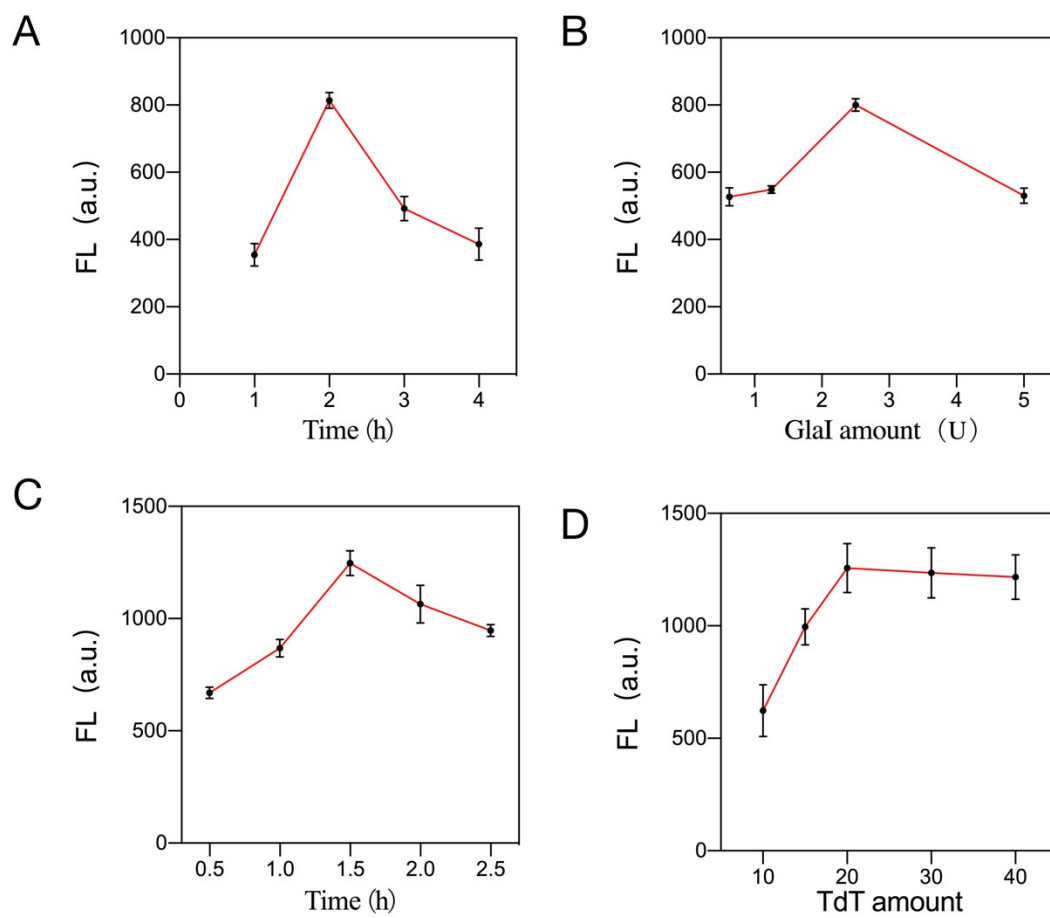

Fig. S1. Optimisation of assay system characteristics. (A) Optimization of methylation/enzyme action time. (B) Optimization of the amount of endonuclease Glal. (C) Optimization of end-transferase tailing time. (D) Optimization of the amount of end-transferase

## Comparison of methods for the detection of methyltransferase activity

Table S2 Comparison of methods for the detection of methyltransferase activity

| Method       | range(U/mL) | LOD(U/mL) | Ref       |
|--------------|-------------|-----------|-----------|
| ECL          | 0.5 – 125   | 0.2       | (1)       |
| ECL          | 5 – 80      | 0.45      | (2)       |
| ECL          | 0-40        | 0.083     | (3)       |
| ECL          | 5-25        | 0.04      | (4)       |
| ECL          | 1-80        | 0.316     | (5)       |
| PEC          | 1–100       | 0.3       | (6)       |
| Fluorescence | 1–20        | 0.18      | (7)       |
| ECL          | 1-40        | 0.3       | (8)       |
| Colorimetry  | 0.2-60      | 0.067     | (9)       |
| Colorimetry  | 0.08-50     | 0.069     | (10)      |
| Colorimetry  | 0.5-10      | 0.05      | (11)      |
| Fluorescence | 0.1-100     | 0.077     | This work |

## Recovery experimental results in human serum samples

Table S3 Recovery experimental results in human serum samples

| Add (U/mL) | Found (U/mL) | Recovery (%) | RSD (%) |
|------------|--------------|--------------|---------|
| 5          | 4.98         | 99.53        | 2.09    |
| 10         | 10.52        | 105.20       | 4.38    |
| 20         | 20.68        | 103.40       | 1.14    |
| 50         | 48.99        | 97.98        | 3.68    |

## Pre-experiment: detection of M.SssI MTase activity in cell lysate

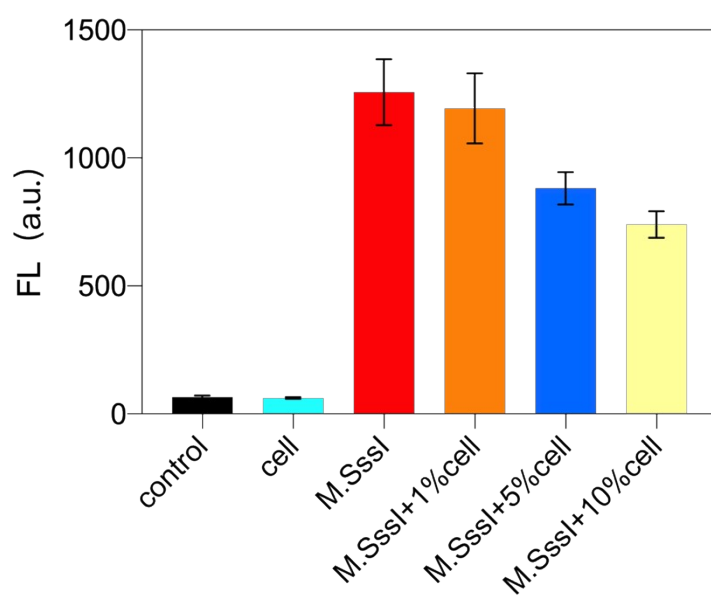

Fig. S2. Pre-experiment: detection of M.SssI MTase activity in cell lysate

## Recovery experimental results in cell lysate

Table S4 Recovery experimental results in cell lysate

| Add (U/mL) | Found (U/mL) | Recovery (%) | RSD (%) |
|------------|--------------|--------------|---------|
| 5          | 5.73         | 114.6        | 8.18    |
| 10         | 10.72        | 107.23       | 17.62   |
| 20         | 19.90        | 99.48        | 11.12   |

## Detection of methyltransferase activity in different human-derived cells.

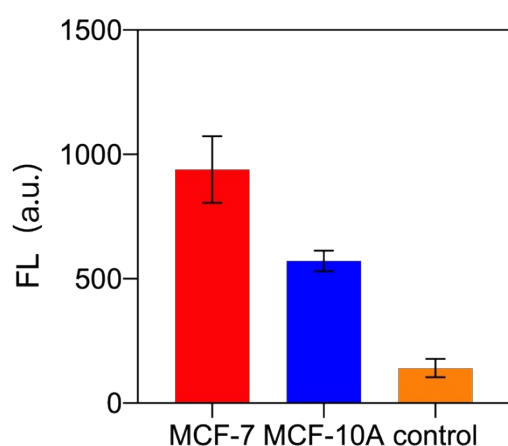

Fig. S3. Detection of methyltransferase activity in different human-derived cells

## Inhibitor screening pre-experiment

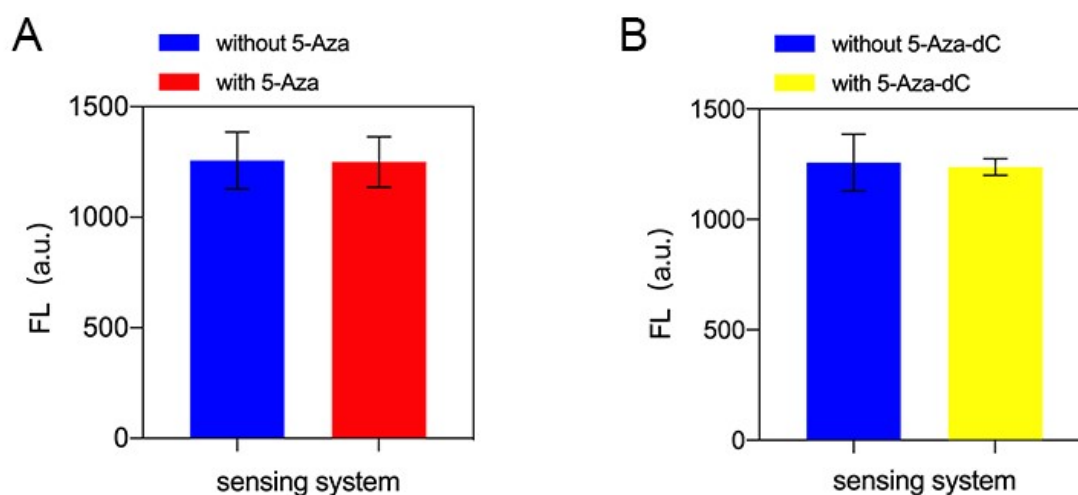

Fig. S4. (A) Inhibitor screening pre-experiment: inhibitor (5-Aza) added after methylation and endocytosis. (B) Inhibitor screening pre-experiment: inhibitor (5-Aza-dC) was added after methylation and endocytosis

## Ref:

1. Lu L, Liu B, Leng J, Ma X. Electrochemical determination of the activity of DNA methyltransferase based on the methyl binding domain protein and a customized modular detector. *Microchim Acta*. 2019;186(4):229.<http://dx.doi.org/10.1007/s00604-019-3309-9>
2. Liu X, Wei C, Luo J, Wu Y, Guo X, Ying Y, et al. Photoelectrochemical determination of the activity of M.SssI methyltransferase, and a method for inhibitor screening. *Microchim Acta*. 2018;185(11): 3034-40.<http://dx.doi.org/10.1007/s00604-018-3033-x>
3. Wang C, Guo Z, Tian R, Zhang K, Wang H, Li F, et al. Ratiometric Electrochemical Biosensing of Methyltransferase Activity. *Catalysts*. 2022;12(11): 1362-73.<http://dx.doi.org/10.3390/catal12111362>
4. Sedlackova E, Bytesnikova Z, Birgusova E, Svec P, Ashrafi AM, Estrela P, et al. Label-Free DNA Biosensor Using Modified Reduced Graphene Oxide Platform as a DNA Methylation Assay. *Materials*. 2020;13(21): 4936.<http://dx.doi.org/10.3390/ma13214936>
5. Haiyan W, Pei L, Wenjing J, Xue L, Huanshun Y, Shiyun A. Photoelectrochemical immunosensing platform for M. SssI methyltransferase activity analysis and inhibitor screening based on g-C<sub>3</sub>N<sub>4</sub> and CdS quantum dots. *Sensors and Actuators B: Chemical*. 2017;244:458-65.<http://dx.doi.org/10.1016/j.snb.2017.01.016>
6. Chen Y, Yi H, Xiang Y, Yuan R. Commercial glucometer as signal transducer for simple evaluation of DNA methyltransferase activity and inhibitors screening. *Anal Chim Acta*. 2018;1001:18-23.<http://dx.doi.org/10.1016/j.aca.2017.11.045>
7. Niu L, Wang X, Mao G, Li Z, Ji X, He Z. Sensitive fluorescent detection of methyltransferase based on thermosensitive poly(N-isopropylacrylamide). *Talanta*. 2018;189:579-84.<http://dx.doi.org/10.1016/j.talanta.2018.07.026>
8. Peng X, Hu T, Bao T, Zhao L, Zeng X, Wen W, et al. A label-free electrochemical biosensor for methyltransferase activity detection and inhibitor screening based on graphene quantum dot and enzyme-catalyzed reaction. *J Electroanal Chem*. 2017;799:327-32.<http://dx.doi.org/10.1016/j.jelechem.2017.06.030>
9. Li Z-M, Zhang X, Pi T, Bu J, Deng R-H, Chi B-Z, et al. Colorimetric determination of the activity of methyltransferase based on nicking enzyme amplification and the use of gold nanoparticles conjugated to graphene oxide. *Microchim Acta*. 2019;186(8): 594.<http://dx.doi.org/10.1007/s00604-019-3690-4>
10. Li Z-M, Zhong X-L, Wen S-H, Zhang L, Liang R-P, Qiu J-D. Colorimetric detection of methyltransferase activity based on the enhancement of CoOOH nanozyme activity by ssDNA. *Sensors and Actuators B-Chemical*. 2019;281:1073-9.<http://dx.doi.org/10.1016/j.snb.2018.11.085>
11. Kermani HA, Hosseini M, Miti A, Dadmehr M, Zuccheri G, Hosseinkhani S, et al.



A colorimetric assay of DNA methyltransferase activity based on peroxidase mimicking of DNA template Ag/Pt bimetallic nanoclusters. *Anal Bioanal Chem.* 2018;410(20):4943-52. <http://dx.doi.org/10.1007/s00216-018-1143-2>
